# Supplementary material for: Exploiting the entire near-infrared spectral range to improve the detection of methane plumes with high-resolution imaging spectrometers
Source: Copernicus journal article supplement (doi:10.5194/amt-2023-168), 2023-08-17
Supplement: Supplementary file [file amt-2023-168-AC1-supplement.pdf]

SWIR-MF

$$\Delta XCH_4(1) |_{SWIR-MF} : \Delta XCH_4 |_{SWIR-MF} > \Delta XCH_4 |_{2300-MF}$$

$$f = \frac{\sigma_{2300-MF}}{\sigma_{SWIR-MF}}$$

$$\Delta XCH_4(1) |_{Combo-MF} = f \cdot \Delta XCH_4(1) |_{SWIR-MF}$$

$$\Delta XCH_4(2) |_{SWIR-MF} : \Delta XCH_4 |_{SWIR-MF} \leq \Delta XCH_4 |_{2300-MF}$$

$$\Delta XCH_4(2) |_{Combo-MF} = \Delta XCH_4(2) |_{2300-MF}$$

Combo-MF
