# Supplementary material for: Exploiting the entire near-infrared spectral range to improve the detection of methane plumes with high-resolution imaging spectrometers
Source: Copernicus journal article supplement (doi:10.5194/amt-2023-168), 2023-08-17
Supplement: Supplementary file [file amt-2023-168-AC2-supplement.pdf]

SWIR-MF

$$\Delta\text{XCH}_4(1) |_{\text{SWIR-MF}} : \Delta\text{XCH}_4 |_{\text{SWIR-MF}} < \Delta\text{XCH}_4 |_{2300\text{-MF}}$$

$$f = \frac{\sigma_{2300\text{-MF}}}{\sigma_{\text{SWIR-MF}}}$$

$$\Delta\text{XCH}_4(1) |_{\text{Combo-MF}} = f \cdot \Delta\text{XCH}_4(1) |_{\text{SWIR-MF}}$$

$$\Delta\text{XCH}_4(2) |_{\text{SWIR-MF}} : \Delta\text{XCH}_4 |_{\text{SWIR-MF}} \geq \Delta\text{XCH}_4 |_{2300\text{-MF}}$$

$$\Delta\text{XCH}_4(2) |_{\text{Combo-MF}} = \Delta\text{XCH}_4(2) |_{2300\text{-MF}}$$

Combo-MF
